# Supplementary material for: Intranasal Administration of Dolutegravir-Loaded Nanoemulsion-Based In Situ Gel for Enhanced Bioavailability and Direct Brain Targeting
Source: MDPI journal article supplement (doi:10.3390/gels9020130), 2023-02-03
Supplement: s1 [file s1]

## Article

# Intranasal Administration of Dolutegravir-Loaded Nanoemulsion-Based In Situ Gel for Enhanced Bioavailability and Direct Brain Targeting

Anroop B. Nair <sup>1,\*</sup>, Sunita Chaudhary <sup>2,†</sup>, Shery Jacob <sup>3</sup>, Dhvani Patel <sup>2</sup>, Pottathil Shinu <sup>4</sup>, Hiral Shah <sup>2</sup>, Ankit Chaudhary <sup>5</sup>, Bandar Aldhubiab <sup>1</sup>, Rashed M. Almuqbil <sup>1</sup>, Ahmed S. Alnaim <sup>1</sup>, Fatemah Alqattan <sup>1</sup> and Jigar Shah <sup>6,\*</sup>

**Table S1.** Percentage transparency at various ratios of surfactant and cosurfactant.

| Surfactant : Cosurfactant | % Transparency |
|---------------------------|----------------|
| 1:1                       | 99.3%          |
| 1:2                       | 95.9%          |
| 1:3                       | 79.1%          |
| 2:1                       | 64.5%          |
| 3:1                       | 69.2%          |

**Table S2.** Composition of pseudo ternary phase diagram (oil and Smix ratio of 1:9).

| Oil (μL) | Smix (μL) | Water (μL) | Total (μL) | Oil % | Smix % | Water % |
|----------|-----------|------------|------------|-------|--------|---------|
| 10       | 90        | 10         | 110        | 9.09  | 81.82  | 9.09    |
| 10       | 90        | 20         | 120        | 8.33  | 75.00  | 16.67   |
| 10       | 90        | 25         | 125        | 8.00  | 72.00  | 20.00   |
| 10       | 90        | 35         | 135        | 7.41  | 66.67  | 25.93   |
| 10       | 90        | 45         | 145        | 6.90  | 62.07  | 31.03   |
| 10       | 90        | 55         | 155        | 6.45  | 58.06  | 35.48   |
| 10       | 90        | 65         | 165        | 6.06  | 54.55  | 39.39   |
| 10       | 90        | 80         | 180        | 5.56  | 50.00  | 44.44   |
| 10       | 90        | 100        | 200        | 5.00  | 45.00  | 50.00   |
| 10       | 90        | 120        | 220        | 4.55  | 40.91  | 54.55   |
| 10       | 90        | 150        | 250        | 4.00  | 36.00  | 60.00   |
| 10       | 90        | 185        | 285        | 3.51  | 31.58  | 64.91   |
| 10       | 90        | 235        | 335        | 2.99  | 26.87  | 70.15   |
| 10       | 90        | 300        | 400        | 2.50  | 22.50  | 75.00   |
| 10       | 90        | 400        | 500        | 2.00  | 18.00  | 80.00   |
| 10       | 90        | 550        | 650        | 1.54  | 13.85  | 84.62   |
| 10       | 90        | 900        | 1000       | 1.00  | 9.00   | 90.00   |
| 10       | 90        | 2000       | 2100       | 0.48  | 4.29   | 95.24   |

**Table S3.** Visual observation during aqueous phase titration for phase diagram construction.

| Volume of aqueous phase | Oil: S <sub>mix</sub> ratio |     |     |     |     |     |     |     |     |
|-------------------------|-----------------------------|-----|-----|-----|-----|-----|-----|-----|-----|
|                         | 1:9                         | 2:8 | 3:7 | 4:6 | 5:5 | 6:4 | 7:3 | 8:2 | 9:1 |
| 10 µL                   |                             |     |     |     |     |     |     |     |     |
| 10 µL                   |                             |     |     |     |     |     |     |     |     |
| 5 µL                    | NE                          |     |     |     |     |     |     |     |     |
| 10 µL                   | NE                          |     |     |     |     |     |     |     |     |
| 10 µL                   | NE                          |     | NE  | NE  |     |     |     | NE  |     |
| 10 µL                   | NE                          | NE  | NE  | NE  | NE  |     | NE  | NE  |     |
| 10 µL                   | NE                          | NE  | NE  | NE  | NE  | NE  | NE  | NE  | NE  |
| 15 µL                   | NE                          | NE  | NE  | NE  | NE  | NE  | NE  | NE  | NE  |
| 20 µL                   | NE                          | NE  | NE  | NE  | NE  | NE  | NE  | NE  | NE  |
| 20 µL                   | NE                          | NE  | NE  | NE  | NE  | NE  | NE  | NE  | NE  |
| 30 µL                   | NE                          | NE  | NE  | NE  | NE  | NE  | NE  | NE  | NE  |
| 35 µL                   | NE                          | NE  | NE  | NE  | NE  | NE  | NE  | NE  | NE  |
| 50 µL                   | NE                          | NE  | NE  | NE  | NE  | NE  | NE  | NE  | NE  |
| 65 µL                   | NE                          | NE  | NE  | NE  | NE  | NE  | NE  | NE  | NE  |
| 100 µL                  | NE                          | NE  | NE  | NE  | NE  | NE  | NE  | NE  | NE  |
| 150 µL                  | NE                          | NE  | NE  | NE  | NE  | NE  | NE  | NE  | NE  |
| 350 µL                  | NE                          | NE  | NE  | NE  | NE  | NE  | NE  | NE  | NE  |
| 1100 µL                 | NE                          | NE  | NE  | NE  | NE  | NE  | NE  | NE  | NE  |

NE, nanoemulsion

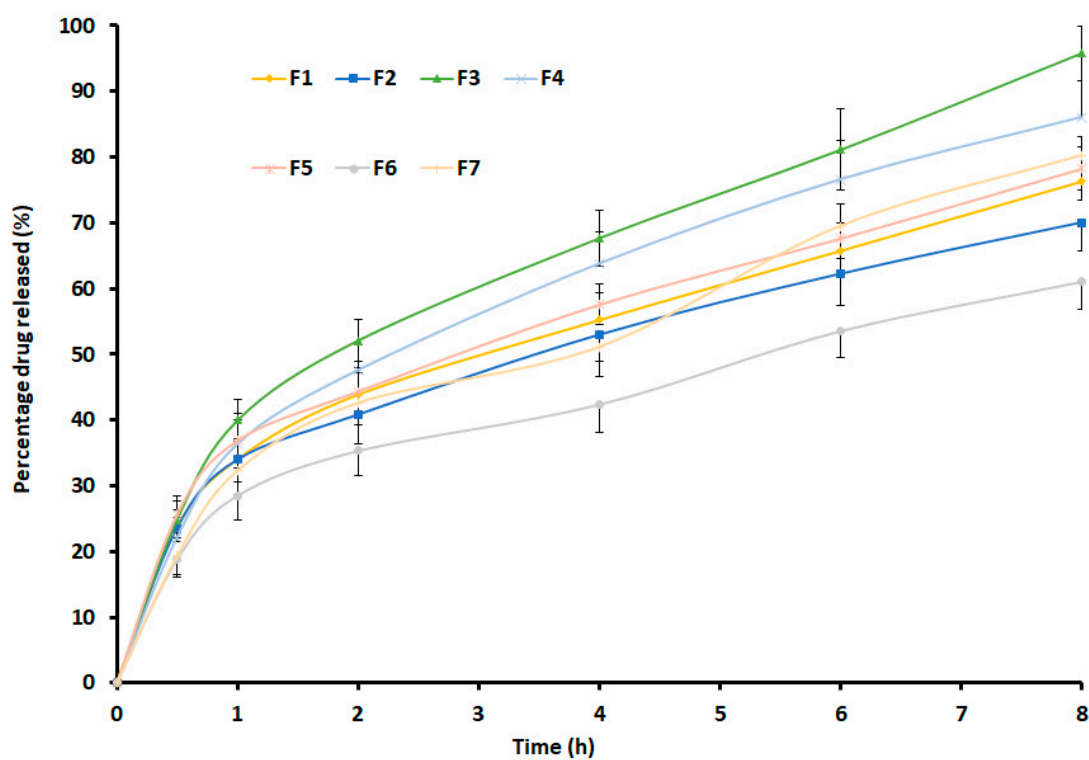**Figure S1.** Percentage Dolutegravir released from nanoemulsions (F1-F7). The value mentioned are average  $\pm$  SD (n = 6).

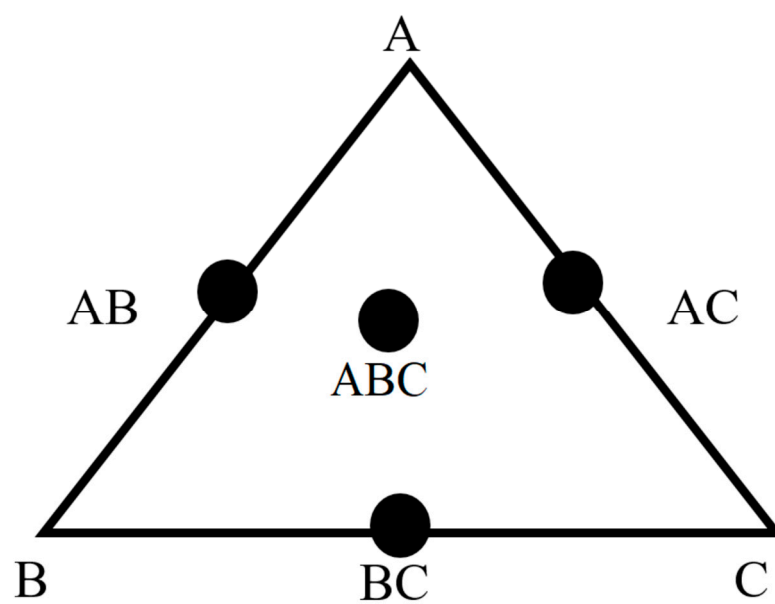

Figure S2. Simplex lattice design.
